# Supplementary material for: Risks of recurrent stroke and all serious vascular events after spontaneous intracerebral haemorrhage: pooled analyses of two population-based studies
Source: PubMed Central journal article supplement (PMC8134058; doi:10.1016/s1474-4422(21)00075-2), 2021-06
Supplement: mmc1.pdf [file mmc1.pdf]

# THE LANCET Neurology

## Supplementary appendix

This appendix formed part of the original submission and has been peer reviewed. We post it as supplied by the authors.

Supplement to: Li L, Poon MTC, Samarasekera NE, et al. Risks of recurrent stroke and all serious vascular events after spontaneous intracerebral haemorrhage: pooled analyses of two population-based studies. *Lancet Neurol* 2021; **20**: 437–47.

**Risks of recurrent stroke and all serious vascular events after spontaneous intracerebral haemorrhage: pooled analyses of two population-based studies**

| Web appendix | Title                                                                                                                                                                                                                          | Page |
|--------------|--------------------------------------------------------------------------------------------------------------------------------------------------------------------------------------------------------------------------------|------|
| 1            | Search strategy                                                                                                                                                                                                                | 2    |
| 2            | Characteristics of all patients with first-in-study-period ICH at diagnosis and hospital discharge in OXVASC (2002-2018) vs. LATCH (2010-2013)                                                                                 | 3    |
| 3            | Characteristics of all OXVASC (2002-2018) patients with first-ever ICH at diagnosis and hospital discharge stratified by ICH location                                                                                          | 4    |
| 4            | Characteristics of all LATCH (2010-2013) patients with first-ever ICH at diagnosis and hospital discharge stratified by ICH location                                                                                           | 5    |
| 5            | Characteristics of all patients with first-ever intracerebral haemorrhage at diagnosis and hospital discharge, stratified by co-morbid atrial fibrillation                                                                     | 6    |
| 6            | Details of recurrent intracerebral haemorrhage (ICH) and ischaemic stroke (IS) stratified by the location of the index ICH in OXVASC and LATCH                                                                                 | 7    |
| 7            | Absolute event rate (per 100 patient years) of first recurrent ICH, ischaemic stroke, or serious vascular event in patients with ICH stratified by ICH location and co-morbid atrial fibrillation (AF) during 5-year follow-up | 8    |
| 8            | Cox regression analyses of the risks of first recurrent ICH, or ischaemic stroke in lobar vs. non-lobar ICH, AF vs. no AF, premorbid use of antithrombotic drugs vs. none adjusting for clustering                             | 9    |
| 9            | Risks of first recurrent ICH, ischaemic stroke or any serious vascular event in lobar vs. non-lobar ICH using the competing risk model (death as competing risk)                                                               | 10   |
| 10           | Risk of first recurrent ICH, ischaemic stroke or any serious vascular event after lobar vs. non-lobar ICH using the competing risk model (death as competing risk) vs. the Kaplan-Meier model                                  | 11   |
| 11           | PRISMA flow diagram                                                                                                                                                                                                            | 12   |
| 12           | Characteristics of studies that reported risks of recurrent ICH or ischaemic stroke, stratified by ICH location                                                                                                                | 13   |
| 13           | Time-course of first recurrent ICH, ischaemic stroke or any serious vascular event after lobar vs. non-lobar ICH stratified by premorbid use of antithrombotic drugs                                                           | 14   |
| 14           | Risks of first recurrent ICH, ischaemic stroke or any serious vascular event with vs. without co-morbid AF using the competing risk model (death as competing risk)                                                            | 15   |
| 15           | Absolute event rate (per 100 patient-years) of first recurrent ICH, ischaemic stroke or serious vascular event in the pooled cohort stratified by co-morbid AF and occlusive vascular disease                                  | 16   |
| 16           | Absolute event rate (per 100 patient-years) of first recurrent ICH, ischaemic stroke or serious vascular event in the pooled cohort stratified by co-morbid AF and occlusive vascular disease using 5-year follow-up data      | 17   |
| 17           | Absolute event rate (per 100 patient years) of first recurrent ICH, ischaemic stroke or any serious vascular event in patients with ICH stratified by co-morbid AF and ICH location                                            | 18   |
| 18           | Absolute event rate (per 100 patient years) of first recurrent ICH, ischaemic stroke or any serious vascular event in patients with ICH stratified by co-morbid AF and ICH location using 5-year follow-up data                | 19   |
| 19           | Comparison of absolute event rates (per 100 person-years) of outcomes in the RESTART trial and the pooled cohort of OXVASC and LATCH using 5-year follow-up                                                                    | 20   |
| 20           | Comparison of the baseline characteristics and event rates in LATCH, OXVASC and RESTART (avoid antiplatelet therapy) using all follow-up data                                                                                  | 21   |
| 21           | Comparison of the baseline characteristics and event rates in LATCH, OXVASC and RESTART (avoid antiplatelet therapy) using 5-year follow-up                                                                                    | 22   |
| 22           | Absolute event rate (per 100 person-years) in OXVASC, LATCH, and RESTART stratified by ICH location using all follow-up data                                                                                                   | 23   |
| 23           | Absolute event rate (per 100 person-years) in OXVASC, LATCH, and RESTART stratified by ICH location using 5-year follow-up data                                                                                                | 24   |

## Web appendix 1 Search strategy

1. exp cerebral haemorrhage/or exp intracranial haemorrhage, hypertensive/
2. (intracerebral adj1 h?emrrhag\*) or (h?emorrhag\* adj1 stroke) or (intracranial adj1 h?emorrhage)
3. (intracerebral adj1 bleed\*) or (intracranial adj1 bleed\*)
4. Recurrence/
5. recurrent stroke or recurrent h?emorrhagi\* stroke or recurrent intracerebral h?emorrhage or recurrent intracerebral bleed\*
6. 1 or 2 or 3
7. 4 or 5
8. 6 and 7
9. Limit 8 to English language
10. Limit 9 to "all adult (19 plus years)"

**Web appendix 2 Characteristics of all patients with first-in-study-period ICH at diagnosis and hospital discharge in OXVASC (2002-2018) vs. LATCH (2010-2013)**

|                                                 | <b>OXVASC<br/>(n=255)</b> | <b>LATCH<sup>‡</sup><br/>(n=419)</b> | <b>p</b> |
|-------------------------------------------------|---------------------------|--------------------------------------|----------|
| Age (mean/SD)                                   | 76/13                     | 75/12                                | 0.25     |
| Male sex                                        | 126 (49.4)                | 194 (46.3)                           | 0.43     |
| NIHSS (median, IQR)**                           | 8 (4-16)                  | n/a                                  | n/a      |
| Location - lobar                                | 109 (43.1)                | 208 (49.6)                           | 0.10     |
| <b>Medical history</b>                          |                           |                                      |          |
| Previous occlusive vascular disease*            | 83 (32.5)                 | 134 (32.1)                           | 0.90     |
| Hypertension                                    | 157 (61.6)                | 272 (64.9)                           | 0.36     |
| Diabetes                                        | 36 (14.1)                 | 47 (11.2)                            | 0.27     |
| Hyperlipidaemia                                 | 59 (23.1)                 | 75 (17.9)                            | 0.10     |
| Atrial fibrillation                             | 57 (22.4)                 | 90 (21.5)                            | 0.80     |
| Current smoking†                                | 24 (9.7)                  | 92 (22.1)                            | <0.0001  |
| <b>Medication before ICH</b>                    |                           |                                      |          |
| Antithrombotic drugs‡                           | 122 (47.8)                | 222 (53.0)                           | 0.20     |
| Anticoagulant drugs                             | 54 (21.2)                 | 56 (13.4)                            | 0.008    |
| Antiplatelet drugs                              | 73 (28.6)                 | 177 (42.2)                           | 0.0004   |
| Antihypertensive drugs                          | 127 (49.8)                | 202 (48.2)                           | 0.69     |
| Statins                                         | 66 (25.9)                 | 156 (40.1)                           | 0.0002   |
| <b>Medication at hospital/clinic discharge#</b> |                           |                                      |          |
|                                                 | (n=143)                   | (n=235)                              |          |
| Antithrombotic drugs‡†                          | 8 (5.6)                   | 14 (6.0)                             | 0.88     |
| Anticoagulant drugs                             | 1 (0.7)                   | 6 (2.6)                              | 0.20     |
| Antiplatelet drugs                              | 7 (4.9)                   | 9 (3.8)                              | 0.62     |
| Antihypertensive drugs                          | 104 (72.7)                | 125 (53.2)                           | 0.0002   |

Numbers are presented as n (%) unless otherwise stated. \* Previous occlusive vascular disease included any history of transient ischaemic attack, stroke, myocardial infarction or peripheral vascular disease. \*\*data missing for n=6 in OXVASC and data not available in LATCH. ‡missing data in LATCH: TIA/stroke (n=1), MI/PVD (n=1), hypertension (n=1), hyperlipidaemia (n=1), AF (n=1), smoking (n=2), statins (n=30). † n=16 on both anticoagulant and antiplatelet drugs. †† n=1 patients on both anticoagulant and antiplatelet drugs. #excluding patients who died before discharge.

**Web appendix 3 Characteristics of all OXVASC (2002-2018) patients with first-ever ICH at diagnosis and hospital discharge stratified by ICH location**

|                                                      | <b>Total<br/>(n=255)*</b> | <b>Lobar ICH<br/>(n=109)</b> | <b>Non-lobar ICH<br/>(n=144)</b> | <b>p</b> |
|------------------------------------------------------|---------------------------|------------------------------|----------------------------------|----------|
| Age (mean/SD)                                        | 75.5/13.1                 | 76.4/12.0                    | 74.8/13.8                        | 0.34     |
| Male sex                                             | 126 (49.4)                | 50 (45.9)                    | 76 (52.8)                        | 0.28     |
| <b>Diagnostic methods</b>                            |                           |                              |                                  |          |
| CT alone                                             | 214 (83.9)                | 87 (79.8)                    | 125 (86.8)                       | 0.38     |
| MRI alone                                            | 4 (1.6)                   | 3 (2.8)                      | 1 (0.7)                          |          |
| CT and MRI                                           | 31 (12.2)                 | 16 (14.7)                    | 15 (10.4)                        |          |
| Autopsy                                              | 6 (2.4)                   | 3 (2.8)                      | 3 (2.1)                          |          |
| <b>NIHSS (median, IQR)**</b>                         | 8 (4-16)                  | 9 (4-17)                     | 8 (4-15)                         | 0.94     |
| <b>Disabling or fatal#</b>                           | 199 (78.0)                | 85 (78.0)                    | 112 (77.8)                       | 0.97     |
| <b>Blood pressure (mmHg) at onset (mean/SD)</b>      |                           |                              |                                  |          |
| Systolic blood pressure                              | 181                       | 170                          | 189                              | 0.0001   |
| Diastolic blood pressure                             | 92                        | 88                           | 94                               | 0.03     |
| <b>Medical history</b>                               |                           |                              |                                  |          |
| Previous transient ischaemic attack or stroke        | 72 (28.2)                 | 39 (35.8)                    | 33 (22.9)                        | 0.03     |
| Myocardial infarction or peripheral vascular disease | 21 (8.3)                  | 15 (13.8)                    | 6 (4.2)                          | 0.006    |
| Hypertension                                         | 157 (61.6)                | 58 (53.2)                    | 98 (68.1)                        | 0.02     |
| Diabetes                                             | 36 (14.1)                 | 14 (12.8)                    | 22 (15.3)                        | 0.58     |
| Hyperlipidaemia                                      | 59 (23.1)                 | 24 (22.0)                    | 35 (24.3)                        | 0.67     |
| Atrial fibrillation                                  | 57 (22.4)                 | 24 (22.0)                    | 33 (22.9)                        | 0.87     |
| Current smoker‡                                      | 24 (9.7)                  | 10 (9.5)                     | 14 (9.9)                         | 0.92     |
| <b>Medication before ICH</b>                         |                           |                              |                                  |          |
| Antithrombotic drugs†                                | 122 (47.8)                | 55 (50.5)                    | 66 (45.8)                        | 0.47     |
| Anticoagulant drugs                                  | 54 (21.2)                 | 27 (24.8)                    | 27 (18.8)                        | 0.25     |
| Antiplatelet drugs                                   | 73 (28.6)                 | 30 (27.5)                    | 42 (29.2)                        | 0.77     |
| Antihypertensive drugs                               | 127 (49.8)                | 49 (45.0)                    | 77 (53.5)                        | 0.18     |
| Statins                                              | 66 (25.9)                 | 36 (33.0)                    | 29 (20.1)                        | 0.02     |
| <b>Medication at hospital/clinic discharge#</b>      |                           |                              |                                  |          |
|                                                      | (n=143)                   | (n=60)                       | (n=83)                           |          |
| Antithrombotic drugs                                 | 8 (5.6)                   | 6 (10.0)                     | 2 (2.4)                          | 0.05     |
| Anticoagulant drugs                                  | 1 (0.7)                   | 1 (1.7)                      | 0 (0)                            | 0.24     |
| Antiplatelet drugs                                   | 7 (4.9)                   | 5 (8.3)                      | 2 (2.4)                          | 0.11     |
| Antihypertensive drugs                               | 104 (72.7)                | 34 (56.7)                    | 70 (84.3)                        | 0.0002   |
| <b>Discharge location</b>                            |                           |                              |                                  |          |
|                                                      | (n=143)                   | (n=60)                       | (n=83)                           | 0.70     |
| Home                                                 | 67 (46.9)                 | 28 (46.7)                    | 39 (47.0)                        |          |
| Community hospital/rehabilitation                    | 71 (49.7)                 | 29 (48.3)                    | 42 (50.6)                        |          |
| Nursing home/carer/sheltered accommodation           | 5 (3.5)                   | 3 (5.0)                      | 2 (2.4)                          |          |

Numbers are presented as n (%) unless otherwise stated. \*n=2 with unknown location due to out-of-area death and no imaging was not accessible; \*\*data missing for n=6. ‡data missing for n=7. # defined as modified Rankin Scale 3 or above. † n=5 patients on both anticoagulant and antiplatelet drugs. #excluding patients that died before discharge.

**Web appendix 4 Characteristics of all LATCH (2010-2013) patients with first-ever ICH at diagnosis and hospital discharge stratified by ICH location**

|                                                      | <b>Total‡<br/>(n=419)</b> | <b>Lobar ICH<br/>(n=208)</b> | <b>Non-lobar ICH<br/>(n=211)</b> | <b>p</b> |
|------------------------------------------------------|---------------------------|------------------------------|----------------------------------|----------|
| Age (mean/SD)                                        | 74.3/12.4                 | 75.0/11.4                    | 73.6/13.2                        | 0.26     |
| Male sex                                             | 194 (46.3)                | 89 (42.8)                    | 105 (49.8)                       | 0.15     |
| <b>Diagnostic methods</b>                            |                           |                              |                                  |          |
| CT                                                   | 404 (96.4)                | 199 (95.7)                   | 205 (97.2)                       |          |
| MRI                                                  | 10 (2.4)                  | 6 (2.9)                      | 4 (1.9)                          |          |
| Autopsy                                              | 5 (1.2)                   | 3 (1.4)                      | 2 (0.9)                          |          |
| <b>ICH volume (cm<sup>3</sup>; median/IQR)*</b>      |                           | 38 (13-87)                   | 12 (4-31)                        |          |
| <b>Medical history</b>                               |                           |                              |                                  |          |
| Previous transient ischaemic attack or stroke        | 97 (23.2)                 | 39 (18.8)                    | 58 (27.5)                        | 0.06     |
| Myocardial infarction or peripheral vascular disease | 58 (13.9)                 | 25 (12.0)                    | 33 (15.7)                        | 0.28     |
| Hypertension                                         | 272 (65.1)                | 120 (57.7)                   | 152 (72.4)                       | 0.002    |
| Diabetes                                             | 47 (11.2)                 | 23 (11.1)                    | 24 (11.4)                        | 0.92     |
| Hyperlipidaemia                                      | 75 (17.9)                 | 34 (16.4)                    | 41 (19.5)                        | 0.40     |
| Atrial fibrillation                                  | 90 (21.5)                 | 39 (18.8)                    | 51 (24.3)                        | 0.17     |
| Current smoker                                       | 92 (22.1)                 | 44 (21.4)                    | 48 (22.8)                        | 0.73     |
| <b>Medication before ICH</b>                         |                           |                              |                                  |          |
| Antithrombotic drugs†                                | 222 (53.0)                | 117 (56.3)                   | 105 (49.8)                       | 0.18     |
| Anticoagulant drugs                                  | 56 (13.4)                 | 25 (12.0)                    | 31 (14.7)                        | 0.42     |
| Antiplatelet drugs                                   | 177 (42.2)                | 98 (47.1)                    | 79 (37.4)                        | 0.05     |
| Antihypertensive drugs                               | 202 (48.2)                | 93 (44.7)                    | 109 (51.7)                       | 0.16     |
| Statins                                              | 156 (40.1)                | 81 (41.5)                    | 75 (38.7)                        | 0.56     |
| <b>Medication at hospital/clinic discharge#</b>      |                           |                              |                                  |          |
|                                                      | (n=235)                   | (n=122)                      | (n=113)                          |          |
| Antithrombotic drugs††                               | 14 (6.0)                  | 6 (4.9)                      | 8 (7.1)                          | 0.48     |
| Anticoagulant drugs                                  | 6 (2.6)                   | 4 (3.3)                      | 2 (1.8)                          | 0.46     |
| Antiplatelet drugs                                   | 9 (3.8)                   | 3 (2.5)                      | 6 (5.3)                          | 0.26     |
| Antihypertensive drugs                               | 125 (53.2)                | 55 (45.1)                    | 70 (61.9)                        | 0.01     |

Numbers are presented as n (%) unless otherwise stated.\*ICH volume calculated using ABC/2 method based on CT images. Missing for patients diagnosed by MRI or at autopsy (N=15). ‡missing data: TIA/stroke (n=1), MI/PVD (n=1), hypertension (n=1), hyperlipidaemia (n=1), AF (n=1), smoking (n=2), statins (n=30). #excluding patients that died prior to discharge. † n=11 patients on both anticoagulant and antiplatelet drugs. †† n=1 patient on both anticoagulant and antiplatelet drugs.

**Web appendix 5 Characteristics of all patients with first-ever intracerebral haemorrhage at diagnosis and hospital discharge, stratified by co-morbid atrial fibrillation**

|                                                 | <b>Total<br/>(n=673) ‡</b> | <b>AF<br/>(n=147)</b> | <b>No AF<br/>(n=526)</b> | <b>p</b> |
|-------------------------------------------------|----------------------------|-----------------------|--------------------------|----------|
| Mean age, y (SD)                                | 74.7 (12.6)                | 79.8 (9.7)            | 73.3 (13.0)              | <0.0001  |
| Male sex                                        | 320 (47.5)                 | 73 (49.7)             | 247 (47.0)               | 0.56     |
| <b>ICH location**</b>                           |                            |                       |                          |          |
| Lobar                                           | 317 (47.2)                 | 63 (42.9)             | 254 (48.5)               | 0.23     |
| Non-lobar                                       | 354 (52.8)                 | 84 (57.1)             | 270 (51.5)               |          |
| <b>Medical history</b>                          |                            |                       |                          |          |
| Previous occlusive vascular disease*            | 218 (32.4)                 | 74 (50.3)             | 144 (27.4)               | <0.0001  |
| Hypertension                                    | 428 (63.6)                 | 129 (87.8)            | 299 (56.8)               | <0.0001  |
| Diabetes                                        | 83 (12.3)                  | 26 (17.7)             | 57 (10.8)                | 0.03     |
| Hyperlipidaemia                                 | 134 (19.9)                 | 42 (28.6)             | 92 (17.5)                | 0.003    |
| Current smoker                                  | 116 (17.5)                 | 13 (9.0)              | 103 (19.8)               | 0.002    |
| <b>Medication before ICH</b>                    |                            |                       |                          |          |
| Antithrombotics†                                | 344 (51.1)                 | 130 (88.4)            | 214 (40.7)               | <0.0001  |
| Anticoagulant drugs                             | 110 (16.3)                 | 84 (57.1)             | 26 (4.9)                 | <0.0001  |
| Antiplatelet drugs                              | 250 (37.1)                 | 58 (39.5)             | 192 (36.5)               | 0.51     |
| Antihypertensive drugs                          | 329 (48.9)                 | 119 (81.0)            | 210 (39.9)               | <0.0001  |
| Statins                                         | 222 (34.5)                 | 68 (46.3)             | 154 (31.0)               | 0.001    |
| <b>Medication at hospital/clinic discharge#</b> | (n=378)                    | (n=84)                | (n=294)                  |          |
| Antithrombotic drugs††                          | 22 (5.8)                   | 14 (16.7)             | 8 (2.7)                  | <0.0001  |
| Anticoagulant drugs                             | 7 (1.9)                    | 5 (6.0)               | 2 (0.7)                  | 0.002    |
| Antiplatelet drugs                              | 16 (4.2)                   | 10 (11.9)             | 6 (2.0)                  | <0.0001  |
| Antihypertensive drugs                          | 229 (60.6)                 | 68 (81.0)             | 161 (54.8)               | <0.0001  |

Numbers are presented as n (%) unless otherwise stated. ICH=intracerebral haemorrhage. AF=atrial fibrillation. ‡missing data in LATCH: TIA/stroke (n=1), MI/PVD (n=1), hypertension (n=1), hyperlipidaemia (n=1), AF (n=1), smoking (n=2), statins (n=30); missing data in OXVASC: smoking (n=8).\*\*n=2 with unknown location due to out-of-area death and no imaging was not accessible. \*previous occlusive vascular disease included any history of transient ischaemic attack, stroke, myocardial infarction or peripheral vascular disease† n=16 on both anticoagulant and antiplatelet drugs; #excluding patients that died prior to discharge. †† n=1 on both anticoagulant and antiplatelet drugs.

**Web appendix 6 Details of recurrent intracerebral haemorrhage (ICH) and ischaemic stroke (IS) stratified by the location of the index ICH in OXVASC and LATCH**

|                                                                  | Recurrent ICH:  |                 | IS:          |                 |
|------------------------------------------------------------------|-----------------|-----------------|--------------|-----------------|
|                                                                  | Index lobar     | Index Non-lobar | Index lobar  | Index Non-lobar |
| <b>OXVASC:</b>                                                   | <b>(n=11)</b>   | <b>(n=4)</b>    | <b>(n=4)</b> | <b>(n=3)</b>    |
| <b>Location of recurrent event</b>                               |                 |                 |              |                 |
| Lobar                                                            | 11 (100.0%)     | 2 (50.0%)       | NA           | NA              |
| Non-lobar                                                        | 0 (0)           | 2 (50.0%)       | NA           | NA              |
| <b>Severity of recurrent event</b>                               |                 |                 |              |                 |
| Fatal                                                            | 4 (36.4%)       | 2 (50.0%)       | 1 (25.0%)    | 1 (33.3%)       |
| Disabling                                                        | 6 (54.5%)       | 2 (50.0%)       | 2 (50.0%)    | 1 (33.3%)       |
| Non-disabling                                                    | 1 (9.1%)        | 0 (0)           | 1 (25.0%)    | 1 (33.3%)       |
| <b>Use of antithrombotics before recurrent event</b>             |                 |                 |              |                 |
| Never on antithrombotics                                         | 4 (36.4%)       | 4 (100.0%)      | 0 (0)        | 1 (33.3%)       |
| Antiplatelets stopped & not restarted after index ICH            | 5 (45.5%)       | 0 (0)           | 1 (25.0%)    | 0 (0)           |
| Anticoagulants stopped & not restarted after index ICH           | 1 (9.1%)        | 0 (0)           | 2 (50.0%)    | 2 (66.7%)       |
| Antithrombotics restarted after index ICH                        | 1 (9.1%)        | 0 (0)           | 1 (25.0%)    | 0 (0)           |
| <b>Use of antihypertensives before recurrent event</b>           | 3 (27.3%)       | 3 (75.0%)       | 3 (75.0%)    | 3 (100.0%)      |
| <b>Mean follow-up blood pressure <math>\leq</math>130/80mmHg</b> | 6 (75.0%)*      | 1 (33.3%)*      | 1 (25.0%)    | 1 (50.0%)*      |
| <b>LATCH:</b>                                                    | <b>(n=22)**</b> | <b>(n=9)</b>    | <b>(n=8)</b> | <b>(n=10)</b>   |
| <b>Location of recurrent event</b>                               |                 |                 |              |                 |
| Lobar                                                            | 21 (100%)       | 3 (33.3%)       | NA           | NA              |
| Non-lobar                                                        | 0 (0)           | 6 (66.7%)       | NA           | NA              |
| <b>Severity of recurrent event</b>                               |                 |                 |              |                 |
| Fatal                                                            | 6 (27.3%)       | 3 (33.3%)       | 1 (1.3%)     | 2 (20%)         |
| Non-disabling                                                    | 16 (72.7%)      | 6 (66.7%)       | 7 (8.7%)     | 8 (80%)         |
| <b>Use of antithrombotics before recurrent event</b>             |                 |                 |              |                 |
| Never on antithrombotics                                         | 11 (50.0%)      | 4 (44.4%)       | 3 (37.5%)    | 4 (40.0%)       |
| Antiplatelets stopped & not restarted after index ICH            | 7 (31.8%)       | 1 (11.1%)       | 2 (25.0%)    | 3 (30.0%)       |
| Anticoagulants stopped & not restarted after index ICH           | 1 (4.5%)        | 0 (0)           | 0 (0)        | 1 (10.0%)       |
| Antithrombotics restarted after index ICH                        | 3 (13.6%)       | 2 (22.2%)       | 2 (25.0%)    | 1 (10.0%)       |
| New antithrombotics initiated during follow-up                   | 0 (0)           | 2 (22.2%)       | 1 (12.5%)    | 1 (10.0%)       |
| <b>Use of antihypertensives before recurrent event</b>           | 11 (50.0%)      | 6 (66.7%)       | 6 (75.0%)    | 7 (70.0%)       |
| <b>Mean follow-up blood pressure <math>\leq</math>130/80mmHg</b> | 4 (33.3%)**     | 2 (28.5%)**     | 0 (0)**      | 0 (0)**         |

NA=not applied, ICH=intracerebral haemorrhage, IS=ischaemic stroke. \*follow-up blood pressure available for 8/11, 3/4, 2/3 respectively for recurrent ICH after index lobar, non-lobar ICH and recurrent IS after non-lobar ICH. \*\* follow-up blood pressure available for 12/22, 7/9, 7/8, and 9/10 respectively for recurrent events after index lobar and non-lobar ICH. One patient with recurrent ICH was identified at post-mortem, therefore no location information available.
